# Supplementary material for: The Antimicrobial Activity of Annona emarginata (Schltdl.) H. Rainer and Most Active Isolated Compounds against Clinically Important Bacteria
Source: PubMed Central journal article supplement (PMC6099495; doi:10.3390/molecules23051187), 2018-05-16
Supplement: molecules-23-01187-s001.pdf [file molecules-23-01187-s001.pdf]

Supplementary material

**Antimicrobial activity of *Annona emarginata* (Schltdl.) H. Rainer and the most active isolated compound, acting against clinically important bacteria. SAR study of structurally related compounds.**

**Juan G. Dolab<sup>1</sup>, Beatriz Lima<sup>2</sup>, Ewelina Spaczynska<sup>3</sup>, Jiri Kos<sup>4</sup>, Natividad Herrera Cano<sup>2</sup>, Gabriela Feresin<sup>2</sup>, Alejandro Tapia<sup>2</sup>, Francisco Garibotto<sup>1,5</sup>, Elisa Petenatti<sup>1</sup>, Mónica Olivella<sup>1</sup>, Robert Musiol<sup>3</sup>, Josef Jampilek<sup>4,\*</sup>, Ricardo D Enriz<sup>1,5\*</sup>**

<sup>1</sup>*Facultad de Química Bioquímica y Farmacia, Universidad Nacional de San Luis, Chacabuco 917. 5700 San Luis Argentina*

<sup>2</sup>*Instituto de Biotecnología-Instituto de Ciencias Básicas. Universidad Nacional de San Juan, Av. Libertador General San Martín 1109 (O). CP 5400, San Juan, Argentina*

<sup>3</sup>*Institute of Chemistry, University of Silesia, 75 Pulku Piechoty 1; 41-500 Chorzow, Poland*

<sup>4</sup>*Department of Pharmaceutical Chemistry, Faculty of Pharmacy, Comenius University, Odbojarov 10, 83232 Bratislava, Slovakia.*

<sup>5</sup>*Instituto Multidisciplinario de Investigaciones Biológicas IMIBIO-CONICET. Chacabuco 917, 5700. San Luis, Argentina*

## Table of Contents

|                                                                                                                                                                                                                                                                                                      |    |
|------------------------------------------------------------------------------------------------------------------------------------------------------------------------------------------------------------------------------------------------------------------------------------------------------|----|
| <sup>13</sup> C NMR spectrum of ( <i>R</i> )-2-(4-methylcyclohex-3-en-1-yl)propan-2-yl ( <i>E</i> )-3-(4-hydroxyphenyl)acrylate (1).....                                                                                                                                                             | 4  |
| DEPT spectrum of ( <i>R</i> )-2-(4-methylcyclohex-3-en-1-yl)propan-2-yl ( <i>E</i> )-3-(4-hydroxyphenyl)acrylate (1) .....                                                                                                                                                                           | 5  |
| NOESY spectra of ( <i>R</i> )-2-(4-methylcyclohex-3-en-1-yl)propan-2-yl( <i>E</i> )-3-(4-hydroxyphenyl)acrylate (1).....                                                                                                                                                                             | 6  |
| Circular Dichroism spectra of ( <i>R</i> )-2-(4-methylcyclohex-3-en-1-yl)propan-2-yl( <i>E</i> )-3-(4-hydroxyphenyl)acrylate (1).....                                                                                                                                                                | 9  |
| <sup>1</sup> H NMR spectrum of ( <i>R</i> )-2-(4-methylcyclohex-3-en-1-yl)propan-2-yl ( <i>E</i> )-3-(4-ethoxyphenyl) acrylate (2) .....                                                                                                                                                             | 10 |
| <sup>1</sup> H NMR spectrum of ( <i>R</i> )-2-(4-methylcyclohex-3-en-1-yl)propan-2-yl ( <i>E</i> )-3-(4-ethoxyphenyl) acrylate (2) .....                                                                                                                                                             | 11 |
| <sup>13</sup> C NMR spectrum of ( <i>R</i> )-2-(4-methylcyclohex-3-en-1-yl)propan-2-yl ( <i>E</i> )-3-(4-ethoxyphenyl) acrylate (2).....                                                                                                                                                             | 12 |
| Circular Dichroism spectra of ( <i>R</i> )-2-(4-methylcyclohex-3-en-1-yl)propan-2-yl ( <i>E</i> )-3-(4-ethoxyphenyl) acrylate (2).....                                                                                                                                                               | 14 |
| Figure 1S. Potential Energy Curve (PEC) obtained for torsional angle $\phi$ 1 of compound 1. PEC was calculated at B3LYP/6-31G (d) level of theory.<br>.....                                                                                                                                         | 15 |
| Figure 2S. Contour graphic of Potential Energy Surface (PES) obtained for compound 1 from RHF/3-21G calculations. Full cycle of rotation<br>(from 0° to 360°) is shown for variables $\phi$ 2 vs $\phi$ 3. The iso-energy curves included in an energy window of 4 Kcal/mol are denoted in red. .... | 16 |
| Table 1S. Different conformers obtained for compound 1. Torsional angles corresponds to those shown in Figure 1. ....                                                                                                                                                                                | 17 |

$^1\text{H}$  NMR spectrum of (*R*)-2-(4-methylcyclohex-3-en-1-yl)propan-2-yl (*E*)-3-(4-hydroxyphenyl)acrylate (**1**)

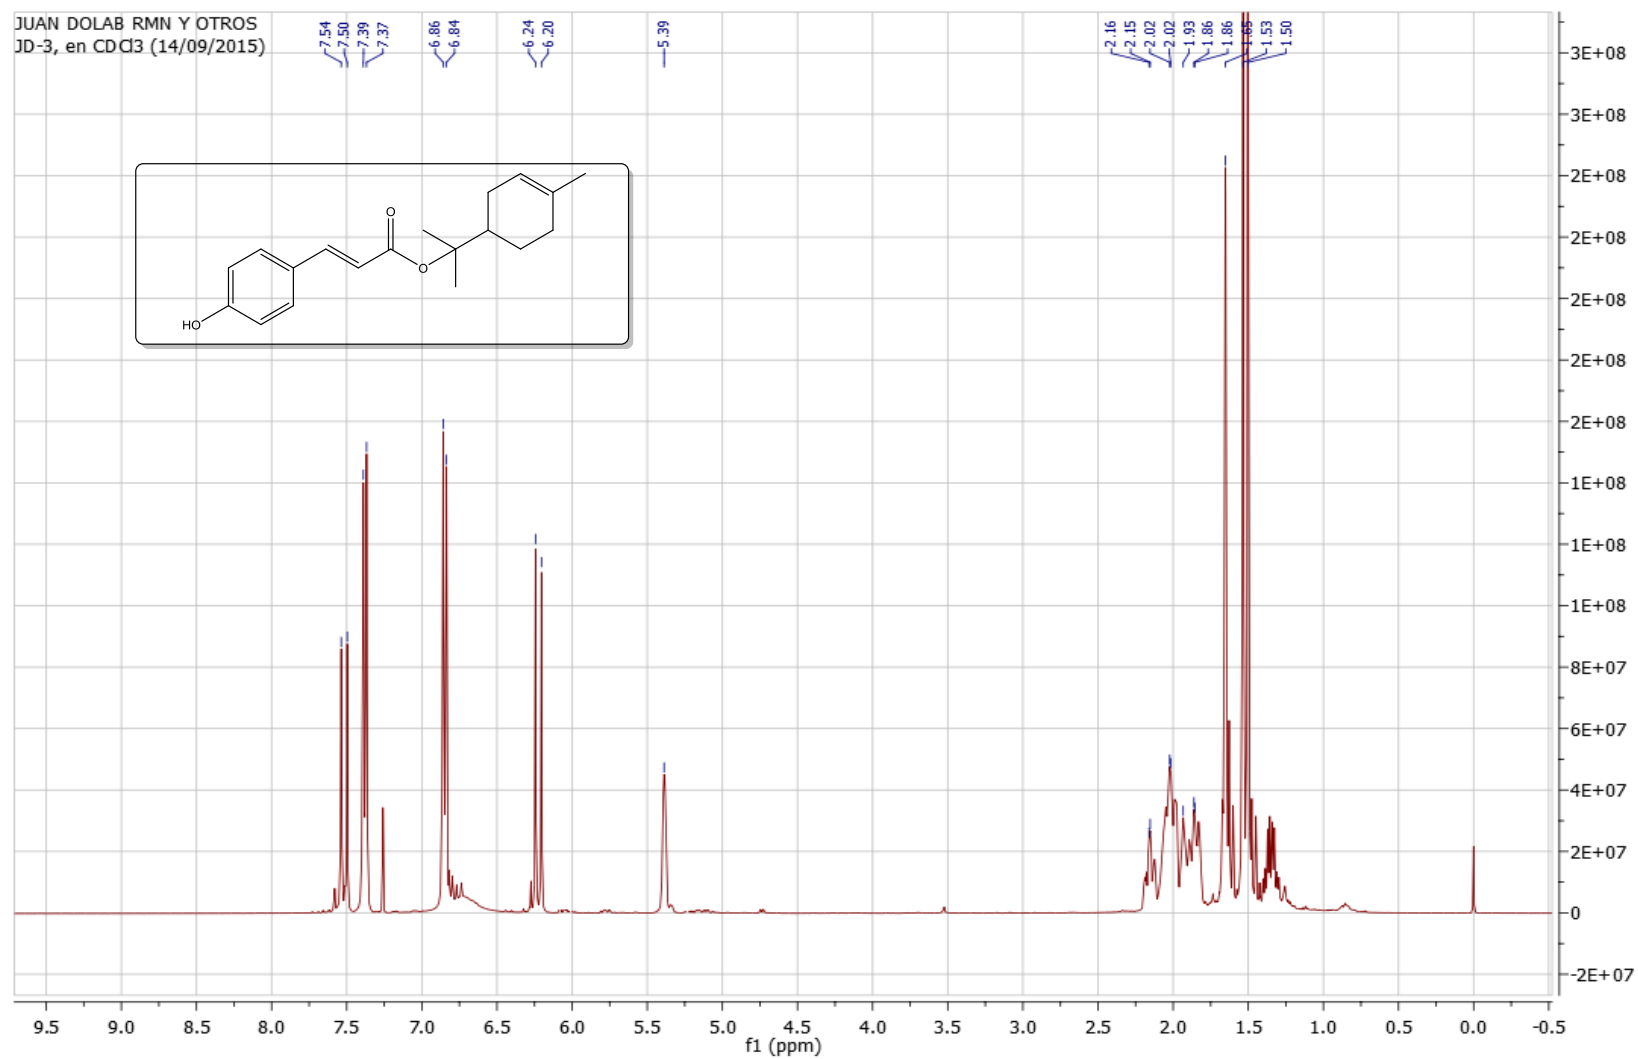

<sup>13</sup>C NMR spectrum of (R)-2-(4-methylcyclohex-3-en-1-yl)propan-2-yl (E)-3-(4-hydroxyphenyl)acrylate (1)

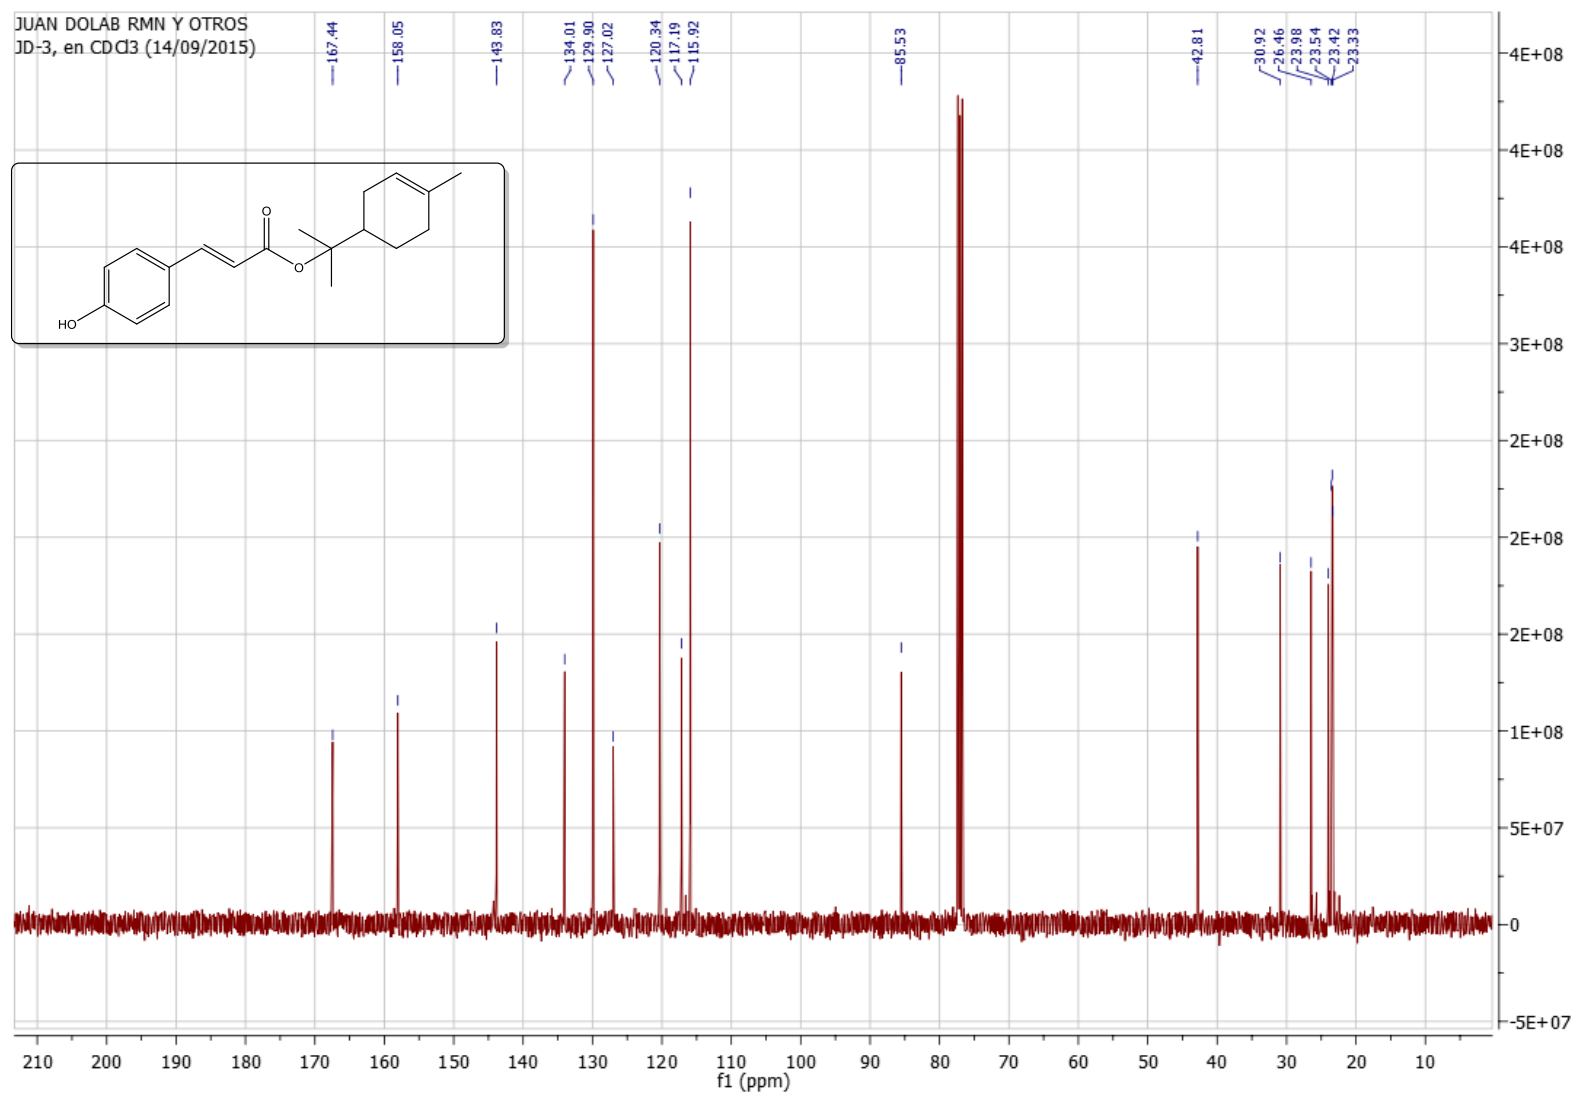

DEPT spectrum of (R)-2-(4-methylcyclohex-3-en-1-yl)propan-2-yl (E)-3-(4-hydroxyphenyl)acrylate (1)

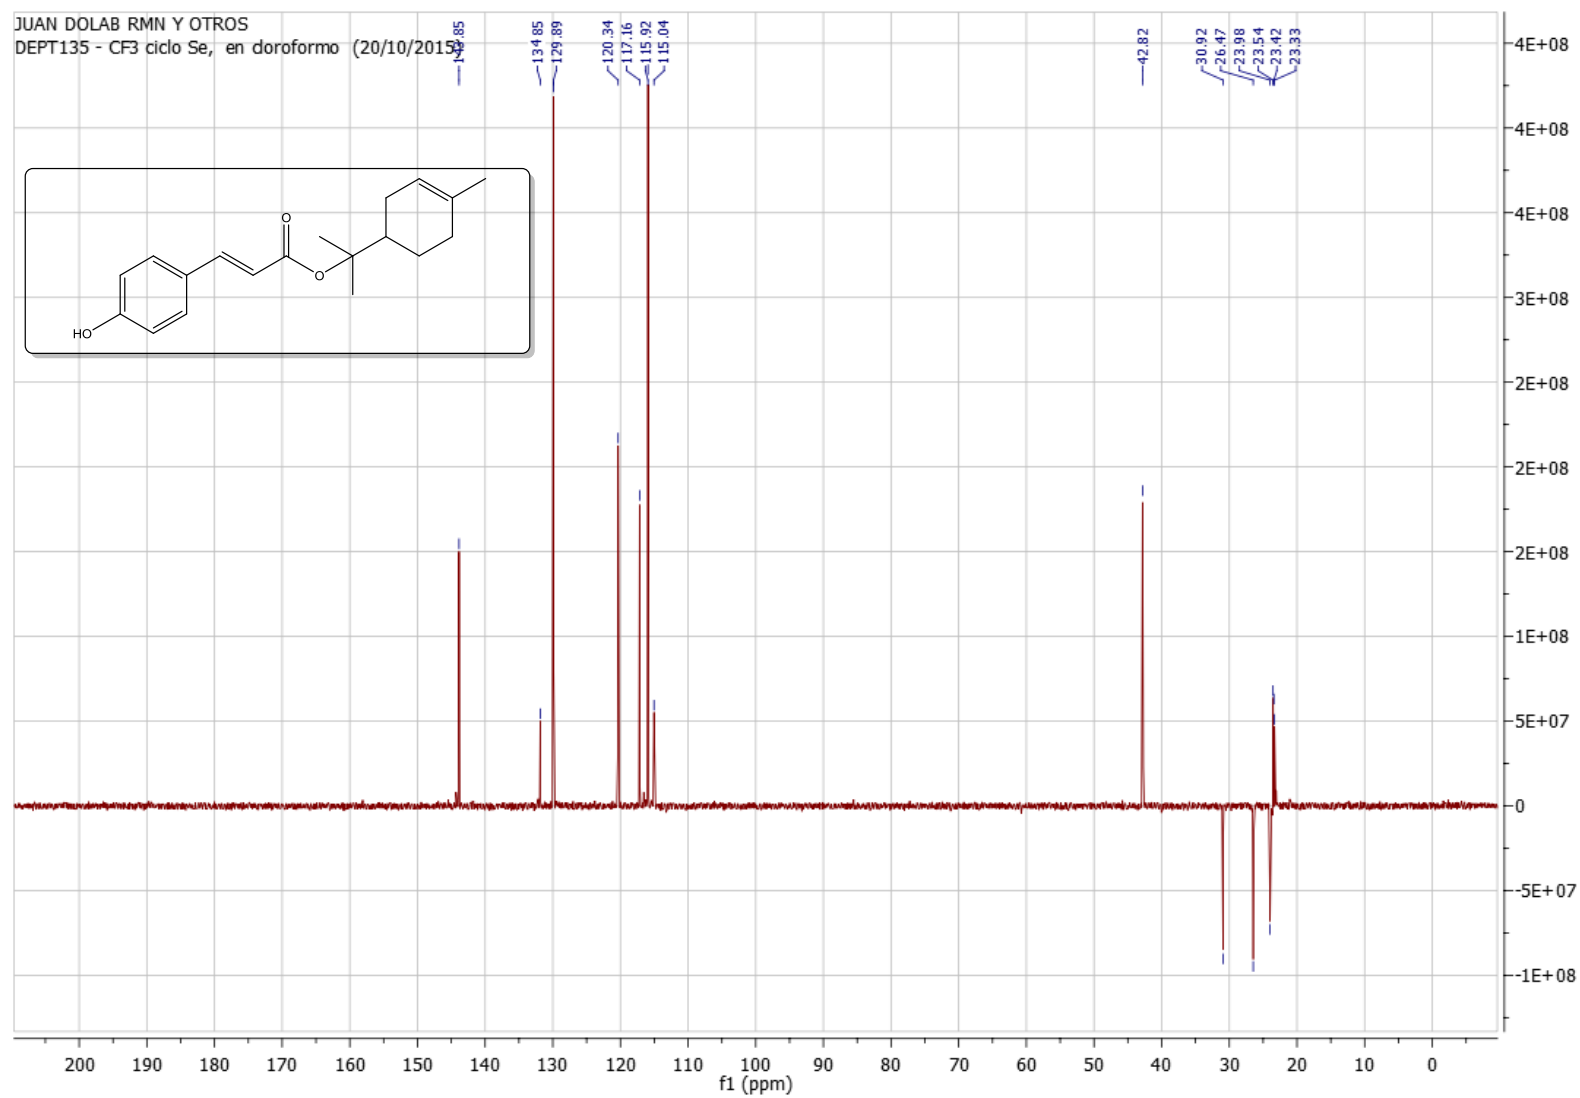

NOESY spectra of (R)-2-(4-methylcyclohex-3-en-1-yl)propan-2-yl(E)-3-(4-hydroxyphenyl)acrylate (1)

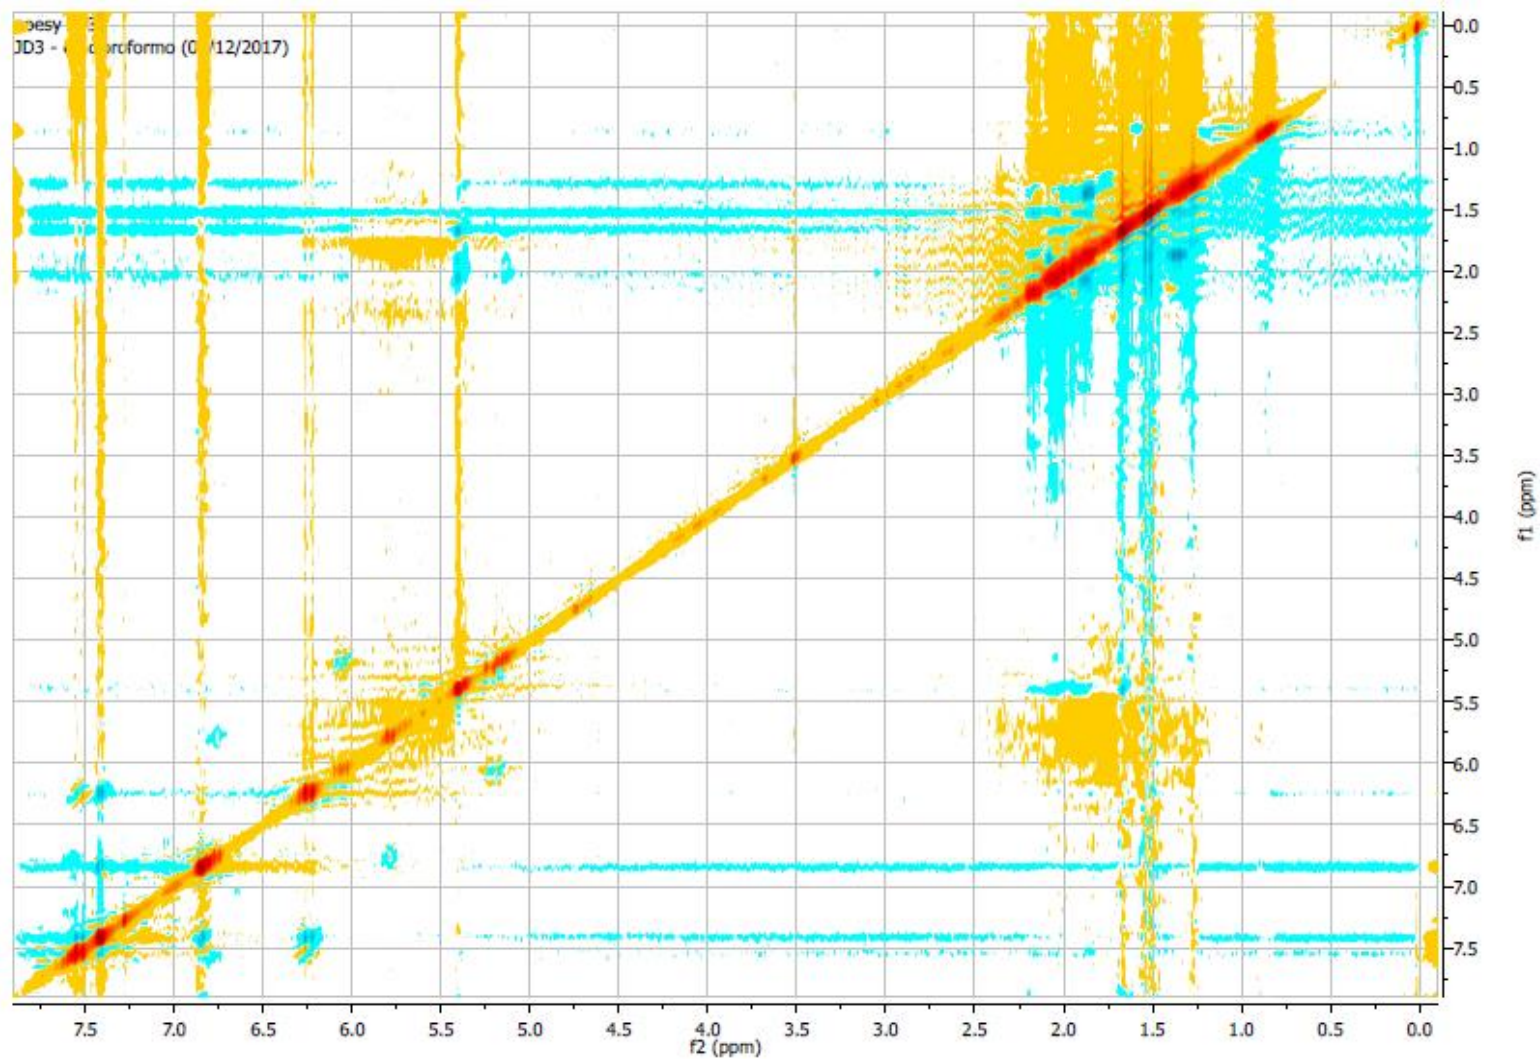

NOESY spectra of (*R*)-2-(4-methylcyclohex-3-en-1-yl)propan-2-yl (*E*)-3-(4-hydroxyphenyl)acrylate (**1**)

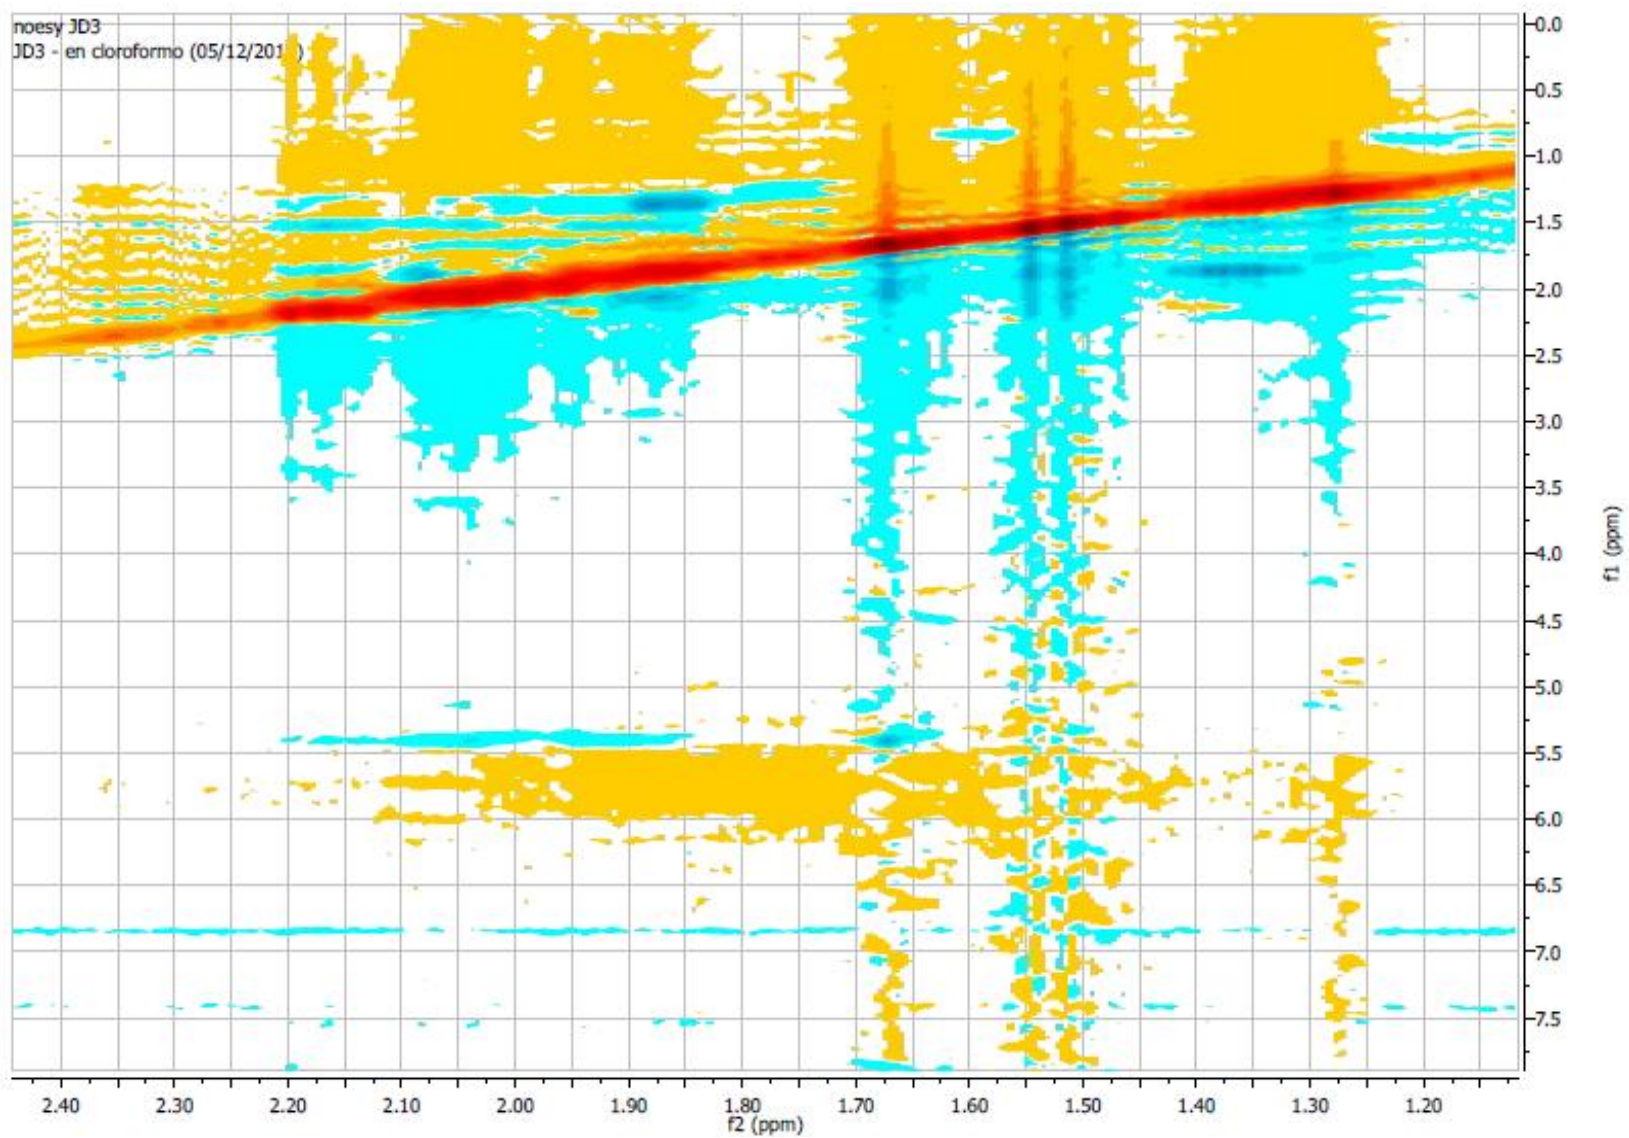

# HRMS spectrum of (R)-2-(4-methylcyclohex-3-en-1-yl)propan-2-yl(E)-3-(4-hydroxyphenyl)acrylate (1)

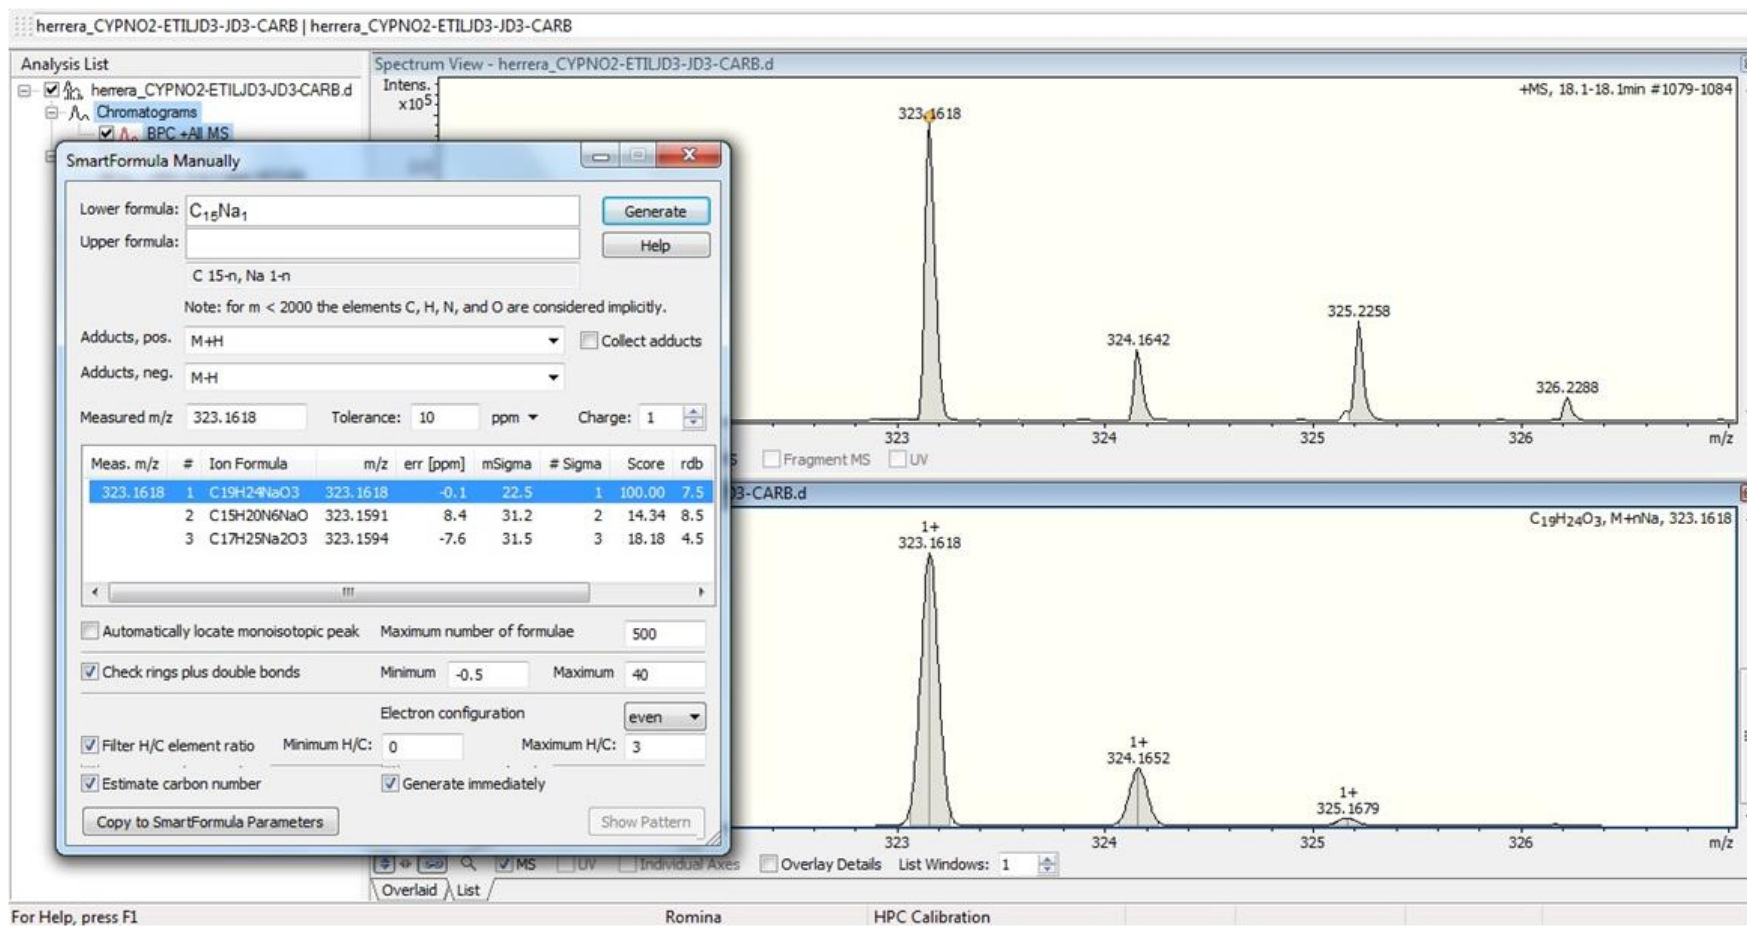



Circular Dichroism spectra of (R)-2-(4-methylcyclohex-3-en-1-yl)propan-2-yl(E)-3-(4-hydroxyphenyl)acrylate (1)

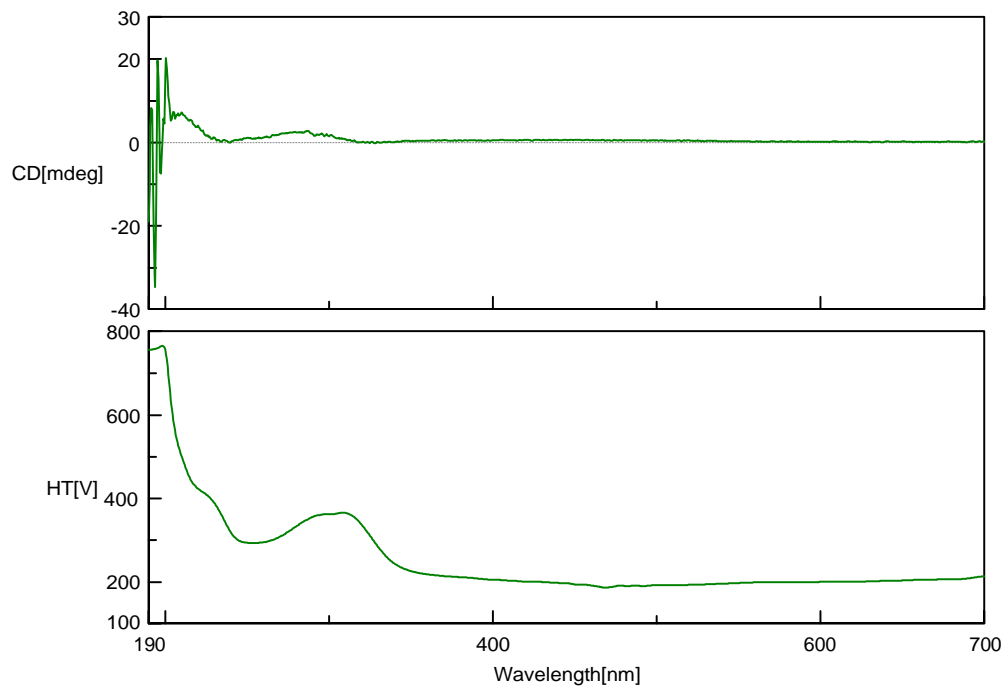

|                   |                      |
|-------------------|----------------------|
| Date              | 04/12/2017 3:19p.m.  |
| File name         | jd3b-blancometanol 2 |
| Model             | J-810                |
| Serial No.        |                      |
| Band width        | 1 nm                 |
| Response          | 1 sec                |
| Sensitivity       | Standard             |
| Measurement range | 700 - 190 nm         |
| Data pitch        | 0.5nm                |
| Scanning speed    | 100 nm/min           |
| Accumulation      | 3                    |
| Sample name       | cata fer             |
| Operator          | DC                   |
| Comment           |                      |

<sup>1</sup>H NMR spectrum of (R)-2-(4-methylcyclohex-3-en-1-yl)propan-2-yl (E)-3-(4-ethoxyphenyl) acrylate (2)

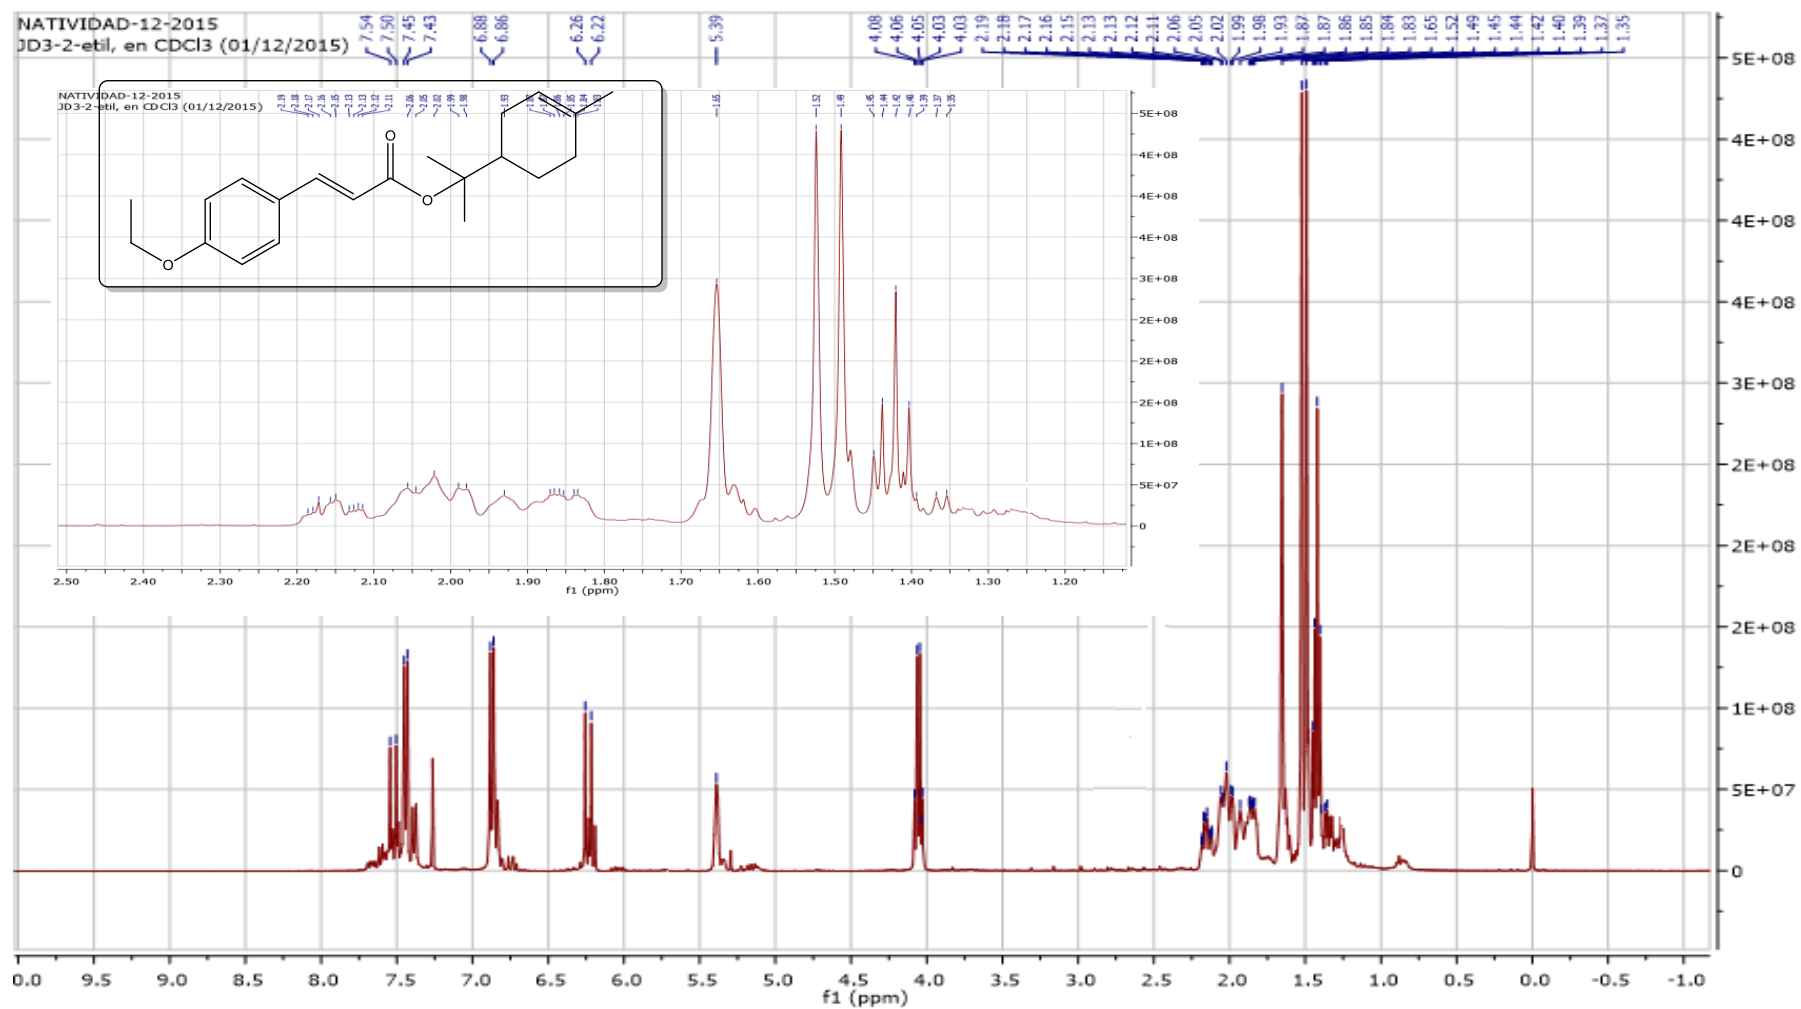

<sup>1</sup>H NMR spectrum of (R)-2-(4-methylcyclohex-3-en-1-yl)propan-2-yl (E)-3-(4-ethoxyphenyl) acrylate (**2**)

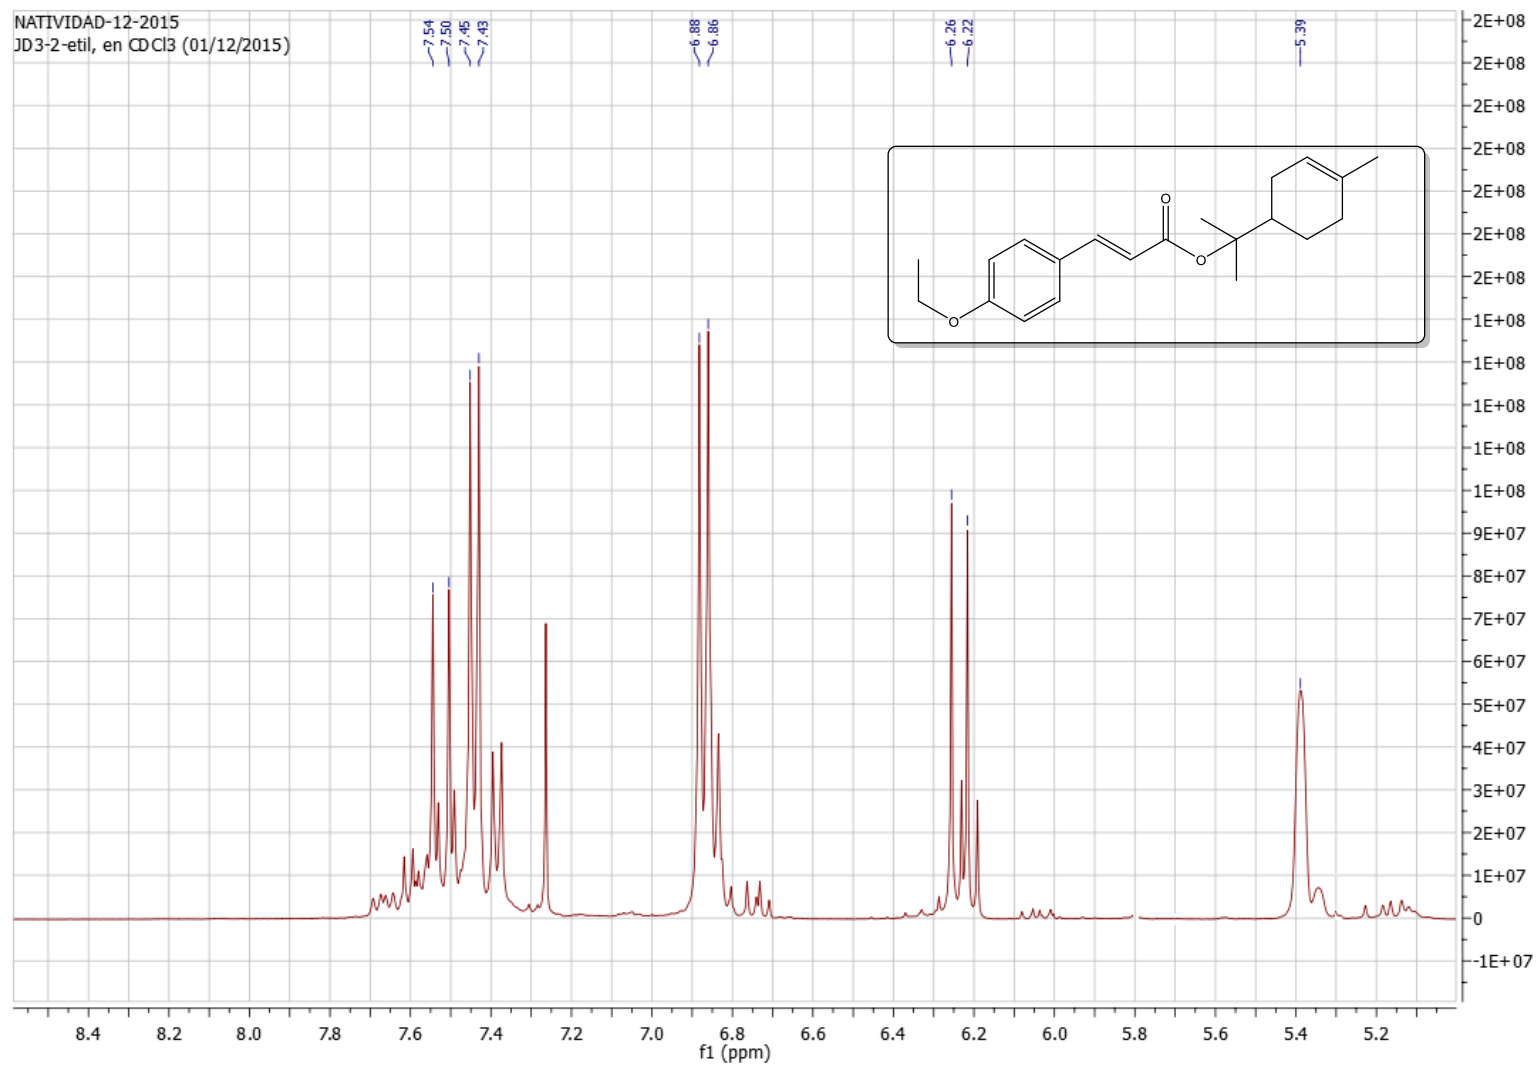

<sup>13</sup>C NMR spectrum of (R)-2-(4-methylcyclohex-3-en-1-yl)propan-2-yl (E)-3-(4-ethoxyphenyl) acrylate (2)

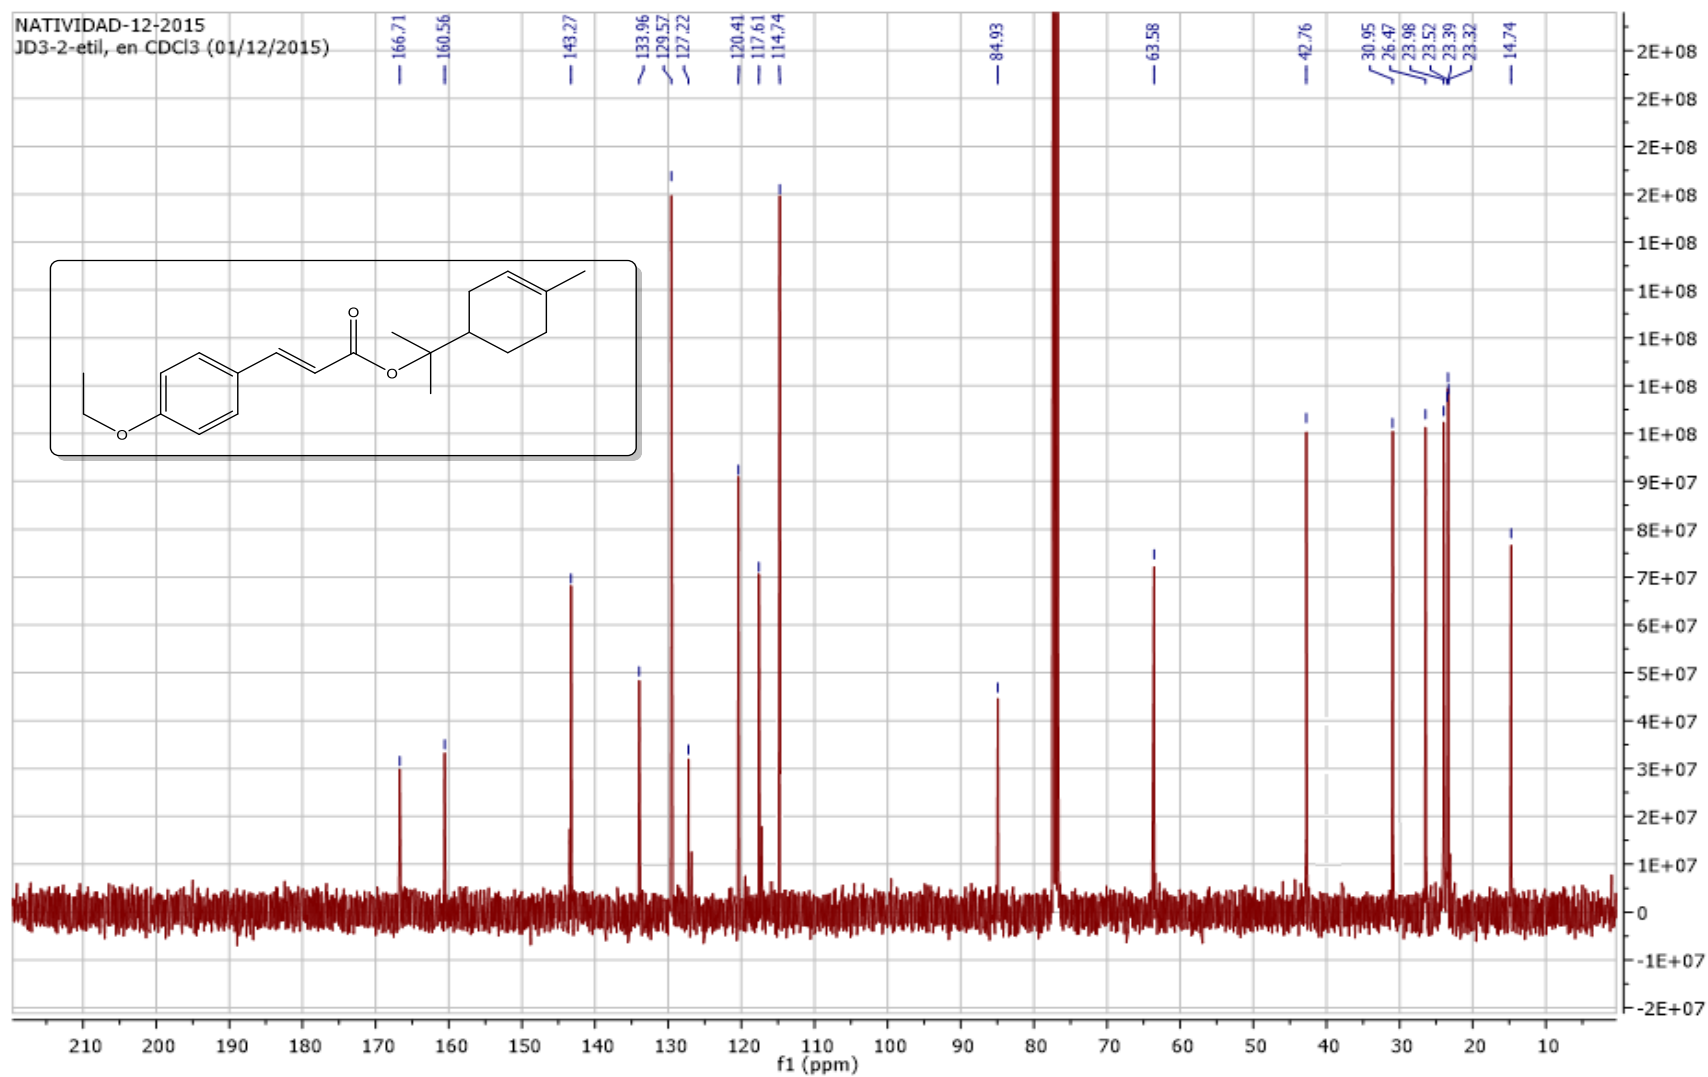

HRMS spectrum of (R)-2-(4-methylcyclohex-3-en-1-yl)propan-2-yl (E)-3-(4-ethoxyphenyl) acrylate (2)

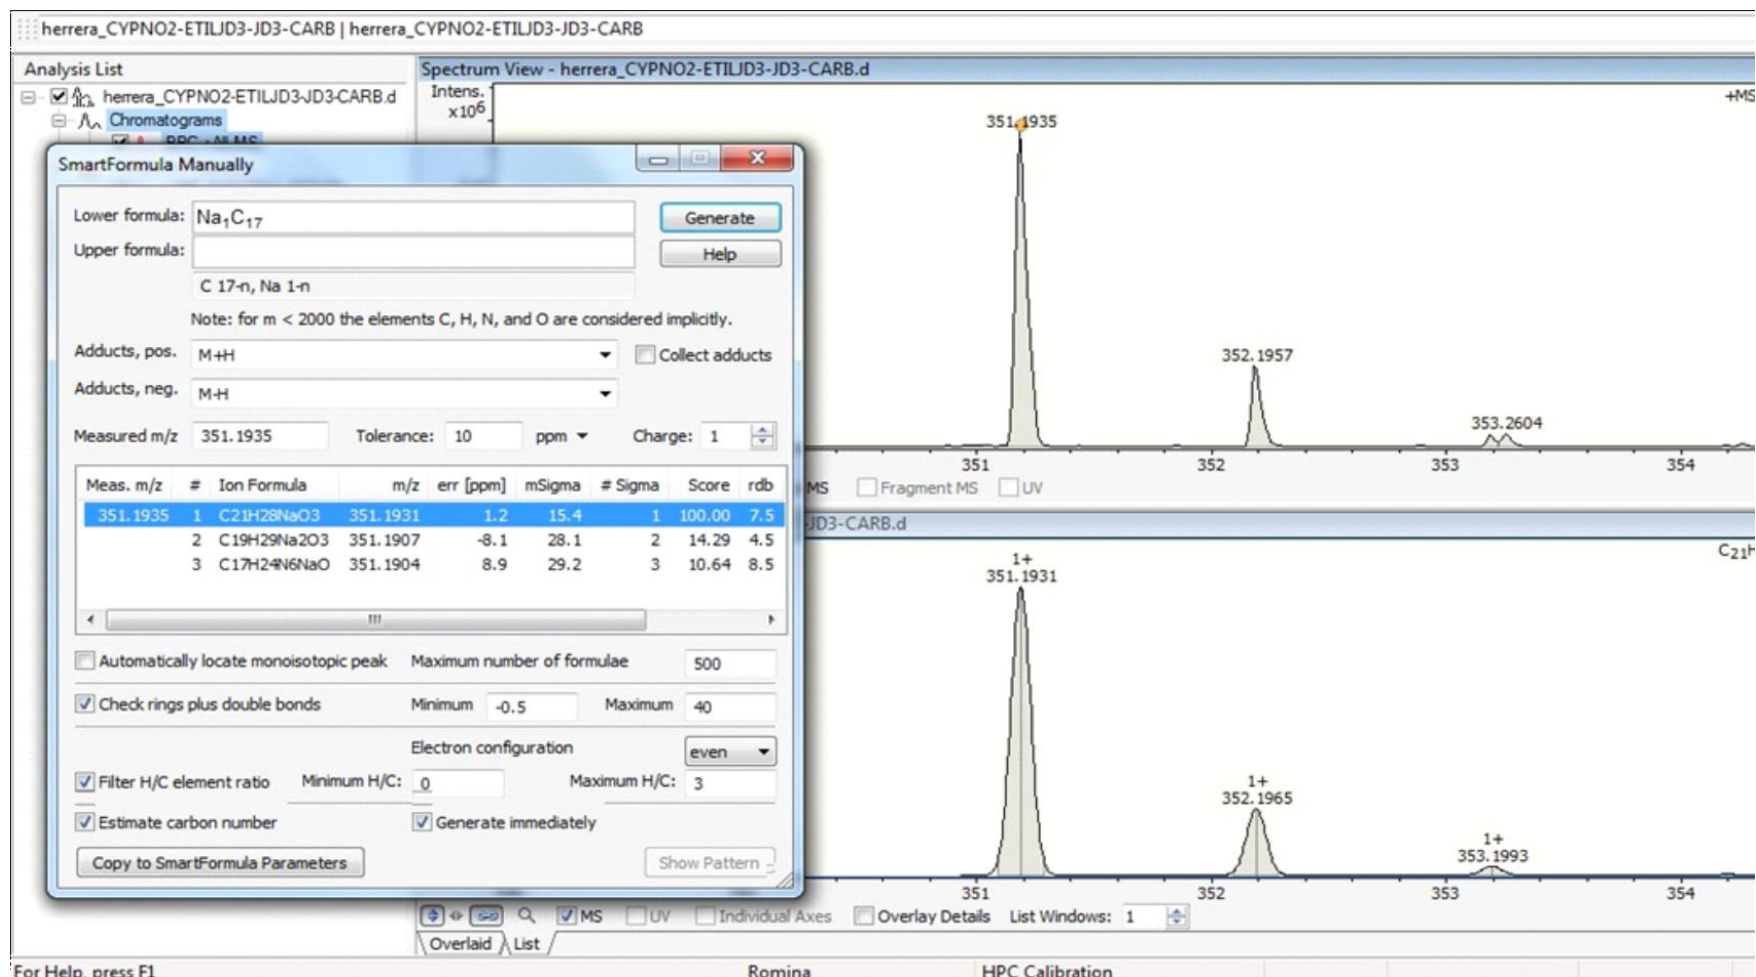

Circular Dichroism spectra of (R)-2-(4-methylcyclohex-3-en-1-yl)propan-2-yl (E)-3-(4-ethoxyphenyl) acrylate (2)

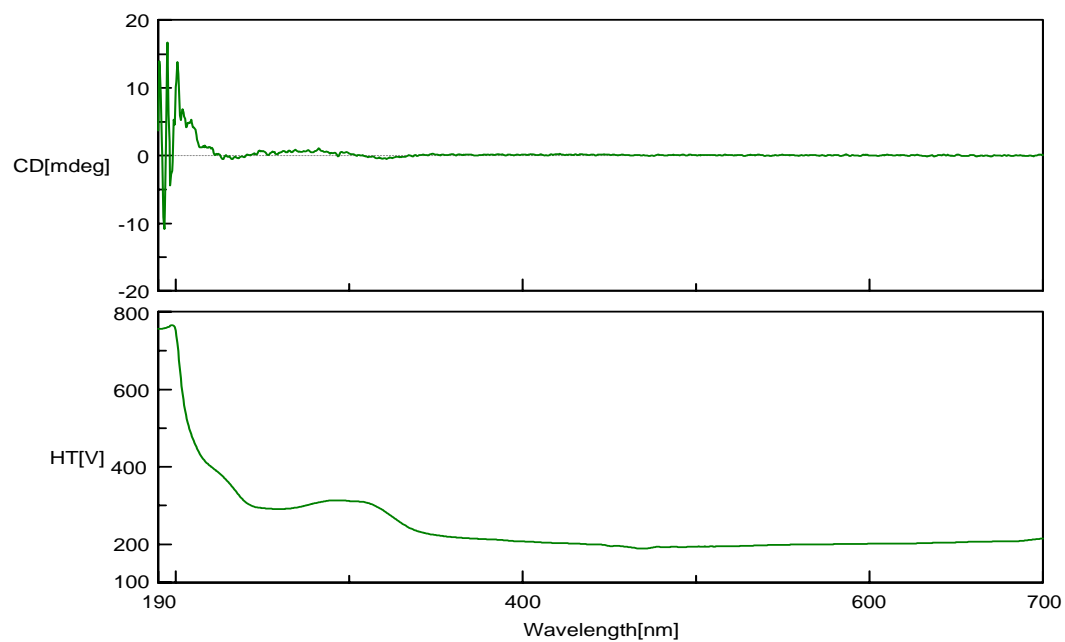

|                   |                      |
|-------------------|----------------------|
| Date              | 04/12/2017 3:38p.m.  |
| File name         | etiljd3-bcometanol 2 |
| Model             | J-810                |
| Serial No.        |                      |
| Band width        | 1 nm                 |
| Response          | 1 sec                |
| Sensitivity       | Standard             |
| Measurement range | 700 - 190 nm         |
| Data pitch        | 0.5nm                |
| Scanning speed    | 100 nm/min           |
| Accumulation      | 3                    |
| Sample name       | cata fer             |
| Operator          | DC                   |
| Comment           |                      |

Figure 1S. Potential Energy Curve (PEC) obtained for torsional angle  $\phi_1$  of compound 1. PEC was calculated at B3LYP/6-31G (d) level of theory.

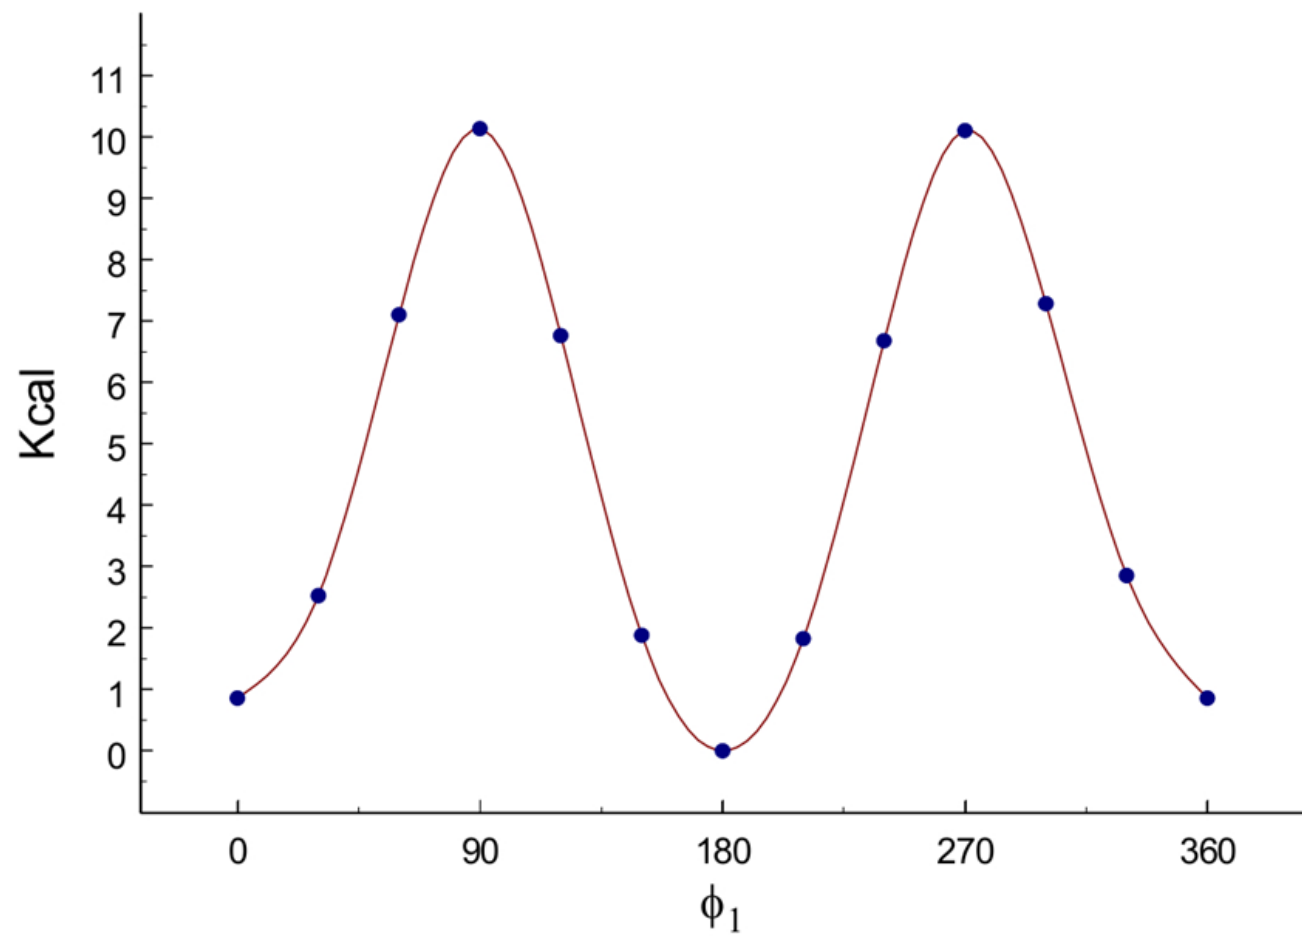

Figure 2S. Contour graphic of Potential Energy Surface (PES) obtained for compound 1 from RHF/3-21G calculations. Full cycle of rotation (from 0° to 360°) is shown for variables  $\phi_2$  vs  $\phi_3$ . The iso-energy curves included in an energy window of 4 Kcal/mol are denoted in red.

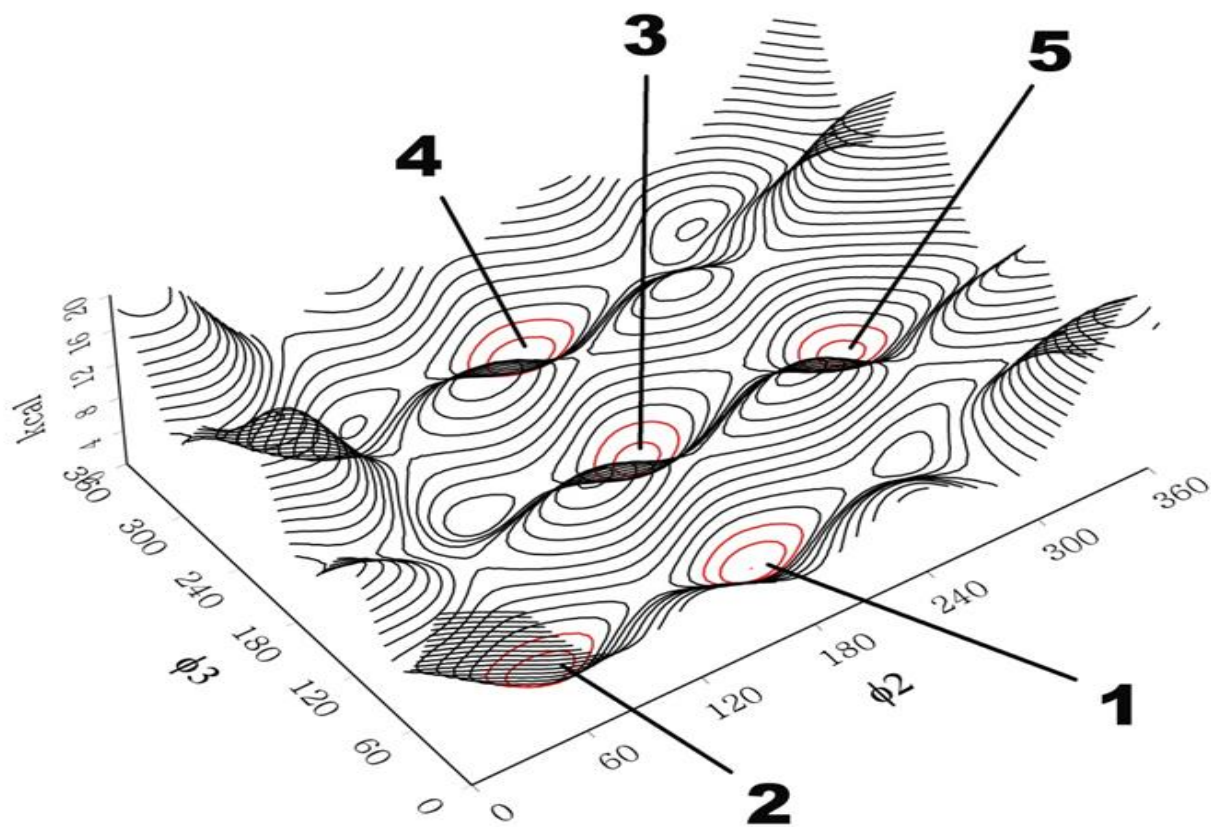



Table 1S. Different conformers obtained for compound 1. Torsional angles corresponds to those shown in Figure 1.

| <b>Conformer</b> | <b><math>\Phi_1</math></b> | <b><math>\Phi_2</math></b> | <b><math>\Phi_3</math></b> | <b><math>\Delta Kcal/mol</math></b> |
|------------------|----------------------------|----------------------------|----------------------------|-------------------------------------|
| 1                | 179,57                     | -179,9                     | 63,72                      | 0                                   |
| 2                | 179,6                      | 65,31                      | 57,42                      | 0,16140812                          |
| 3                | -179,9                     | 179,97                     | 179,67                     | 0,45619349                          |
| 4                | 178,95                     | 179,34                     | -60,173                    | 0,02813127                          |
| 5                | -179,86                    | -63,13                     | -170,68                    | 0,37493095                          |
